# Supplementary material
Source: PubMed Central journal article supplement (PMC6704581)
Supplement: Supplementary_Data.pdf [file Supplementary_Data.pdf]

# **SIRT1 is dispensable for maturation of hematopoietic stem cell in the bone marrow niche**

SU MIN PARK<sup>1</sup>, JAYOUNG KIM<sup>1</sup>, CHAE MI HONG<sup>1</sup>, DONG HOON SHIN<sup>2</sup>, JEE YEON KIM<sup>2</sup>, DO YOUN PARK<sup>2</sup>, DONG HYUN SOHN<sup>3</sup>, YUN HAK KIM<sup>4</sup>, SANG-MO KWON<sup>5</sup>, JAE HO KIM<sup>5</sup>, SUN SIK BAE<sup>6</sup>, KOANHOI KIM<sup>6</sup>, CHI DAE KIM<sup>6</sup>, CHI-DUG KANG<sup>1,7</sup> and DONGJUN LEE<sup>1\*</sup>

<sup>1</sup>Department of Convergence Medical Science, <sup>2</sup>Department of Pathology, <sup>3</sup>Department of Microbiology and Immunology, <sup>4</sup>Department of Anatomy and Department of Biomedical Informatics, Biomedical Research Institute, <sup>5</sup>Department of Physiology, <sup>6</sup>Department of Pharmacology, <sup>7</sup>Department of Biochemistry, Pusan National University School of Medicine, Yangsan 50612, Republic of Korea

Figure S1. Semi-quantitative PCR was performed on genomic DNA from the cells of the indicated genotypes. Sirt1, sirtuin 1; Sirt1<sup>ΔΔ</sup>, sirtuin 1 conditional knockout; Sirt1<sup>+/+</sup>, sirtuin 1 wild-type. Cre, cre recombinase.

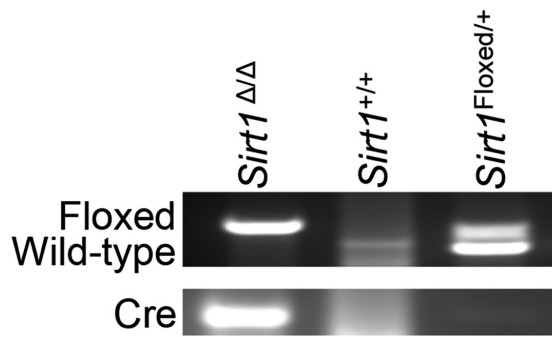

Figure S2. Representative flow cytometry plots of myeloid cells (Mac1<sup>+</sup>), B cells (B220<sup>+</sup>), and T cells (CD3<sup>+</sup>) from the BM from Figure 2 are shown. Mac1, macrophage-1 antigen.

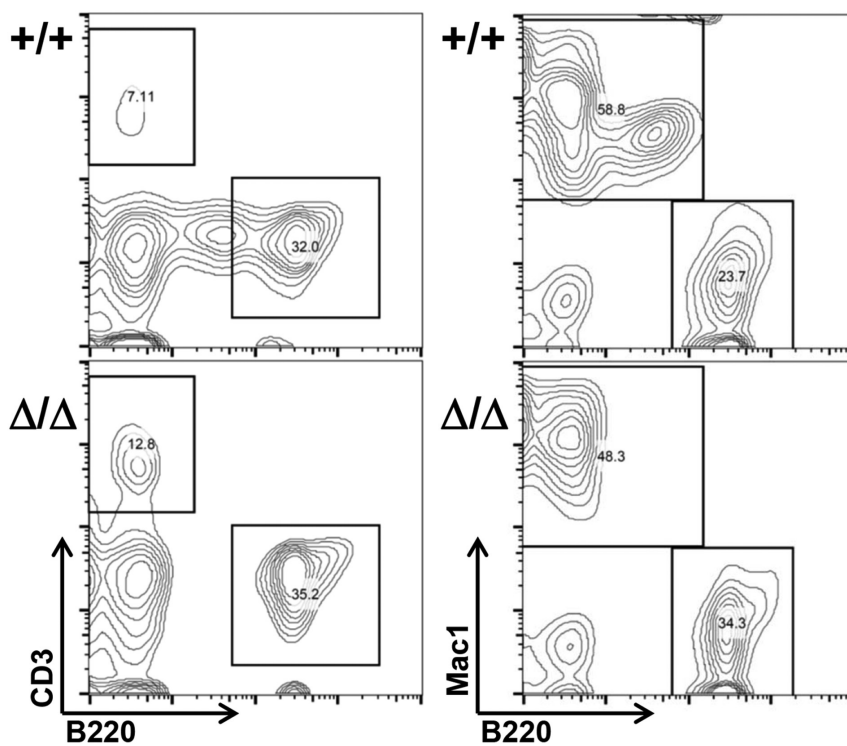

Figure S3. Representative flow cytometry plots of LSK cells, HSC, CLP, CMP, GMP and MEP from Figure 3 are shown. Lin, lineage; Sca1, spinocerebellar ataxia type 1; cKit, mast/stem cell growth factor receptor kit; HSC, hematopoietic (Lin<sup>-</sup>Sca1<sup>+</sup>cKit<sup>+</sup>CD150<sup>+</sup>CD48<sup>-</sup>) stem cells; LSK, Lin<sup>-</sup>Sca1<sup>+</sup>cKit<sup>+</sup> cells; CMP, common myeloid progenitor (Lin<sup>-</sup>Sca1<sup>-</sup>cKit<sup>+</sup>CD34<sup>+</sup>CD16/32<sup>-</sup>) cells; GMP, granulocyte-macrophage progenitor (Lin<sup>-</sup>Sca1<sup>-</sup>cKit<sup>+</sup>CD34<sup>+</sup>CD16/32<sup>+</sup>) cells; MEP, megakaryocyte-erythroid progenitor (Lin<sup>-</sup>Sca1<sup>-</sup>cKit<sup>+</sup>CD34<sup>+</sup>CD16/32<sup>-</sup>) cells; CLP, common lymphoid progenitor (Lin<sup>-</sup>Sca1<sup>low</sup>cKit<sup>low</sup>CD127<sup>+</sup>) cells. BM, bone marrow.

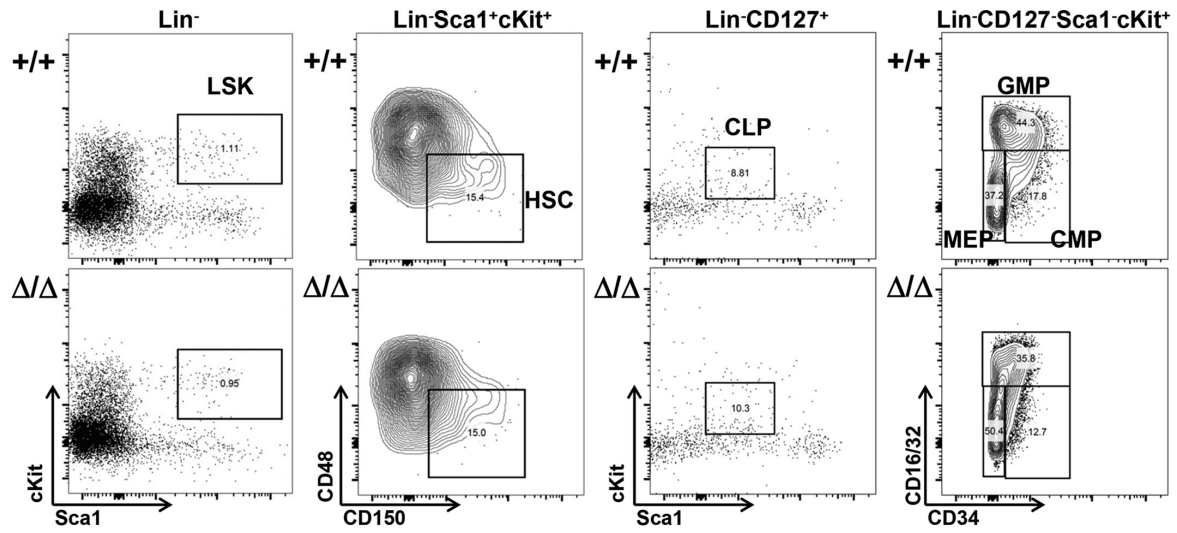

Figure S4. Representative flow cytometry plots of CD45.2<sup>+</sup>, myeloid cells (Mac1<sup>+</sup>), B cells (B220<sup>+</sup>), and T cells (CD3<sup>+</sup>) from the BM cells from Figure 4 are shown. Mac1, macrophage-1 antigen.

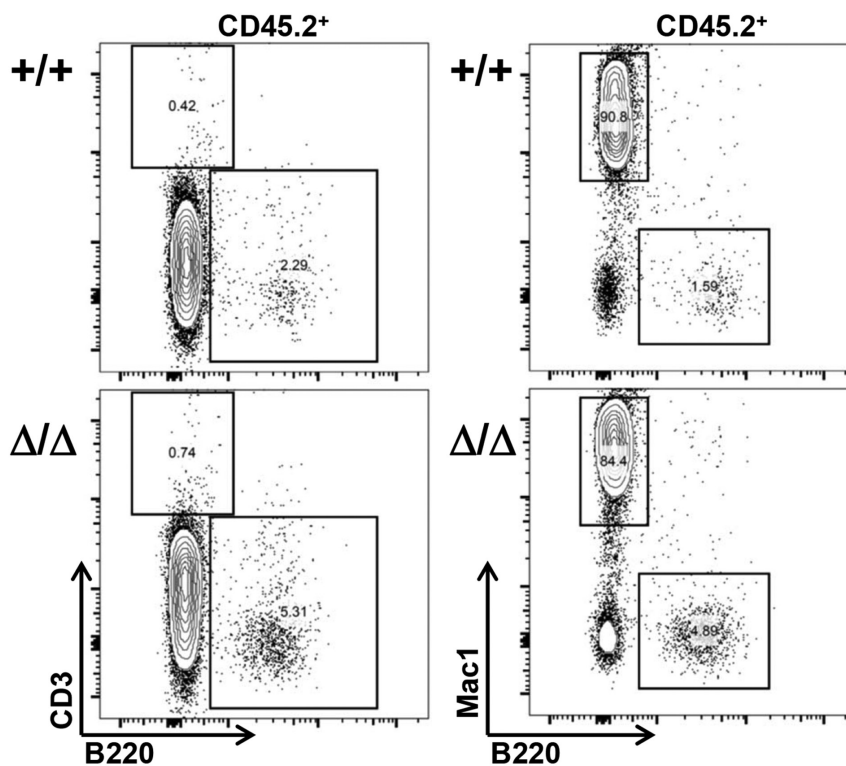

Figure S5. (A) WBC counts, LY, NEU and MO, and B platelet PLT measurements from recipient mice four weeks post-transplantation (n=5). N.s., not significant; WBC, white blood cells; LY, lymphocytes; NEU, neutrophils; MO, monocytes; PLT, platelet; HGB, hemoglobin.

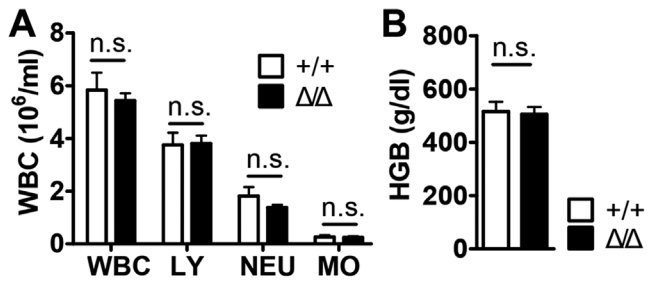

Table S1. Flow Cytometry Antibodies.

| Mature Cell Lineages        |                                                |            |          |
|-----------------------------|------------------------------------------------|------------|----------|
| Antibody                    | Supplier                                       | Cat. no.   | Dilution |
| PE-Mac1 (M1/70)             | BioLegend, Inc.                                | 101208     | 1:100    |
| FITC-B220R (RA3-6B2)        | BD Biosciences                                 | 553088     | 1:100    |
| APC-CD3 (145-2C11)          | eBioscience; Thermo<br>Fisher Scientific, Inc. | 17-0031-83 | 1:100    |
| For HSPC analysis           |                                                |            |          |
| Antibody                    | Supplier                                       | Cat. no.   | Dilution |
| PE-Cy5-CD3 (145-2C11)       | BD Biosciences                                 | 555276     | 1:100    |
| PE-Cy5-CD4 (RM4-5)          | BD Biosciences                                 | 553050     | 1:100    |
| PE-Cy5-CD8 (53-6.7)         | BioLegend, Inc.                                | 100710     | 1:100    |
| PE-Cy5-CD19 (6D5)           | BioLegend, Inc.                                | 115510     | 1:100    |
| PE-Cy5-B220R (RA3-6B2)      | eBioscience                                    | 15-0452-82 | 1:100    |
| PE-Cy5-Gr1 (RB6-8C5)        | eBioscience                                    | 15-5931-82 | 1:100    |
| PE-Cy5-Ter119 (TER119)      | eBioscience                                    | 15-5921-82 | 1:200    |
| PE-Sca1 (D7)                | eBioscience                                    | 12-5981-82 | 1:100    |
| APC-cKit (2B8)              | BioLegend, Inc.                                | 105812     | 1:100    |
| PE-Cy7-CD150 (TC15-12F12.2) | BioLegend, Inc.                                | 115914     | 1:100    |
| APC-Cy7-CD48 (HM48-1)       | BD Biosciences                                 | 561242     | 1:500    |
| FITC-CD34 (RAM34)           | eBioscience                                    | 11-0341-85 | 1:50     |
| PE-Cy7-CD16/32 (93)         | eBioscience                                    | 25-0161-82 | 1:500    |
| APC-eFluor780-CD127 (A7R34) | eBioscience                                    | 47-1271-82 | 1:100    |
| For CD45.2 Analysis         |                                                |            |          |
| Antibody                    | Supplier                                       | Cat. no.   | Dilution |
| FITC-CD45.2 (104)           | BD Biosciences                                 | 553772     | 1:100    |
| PE-Mac1 (M1/70)             | Biolegend                                      | 101208     | 1:100    |
| eFluor450- B220R (RA3-6B2)  | eBioscience                                    | 48-0452-82 | 1:100    |
| PE-Cy5-CD3 (145-2C11)       | BD Biosciences                                 | 555276     | 1:100    |

7-AAD staining was constructed using BrdU Kit according to the manufacturer's protocol (BD Biosciences). Briefly, 20  $\mu$ l 7AAD (BD) was added prior to FACS analysis. PE, R-phycoerythrin; FITC, fluorescein isothiocyanate; APC, allophycocyanin; Lin, lineage; Sca1, spinocerebellar ataxia type 1; cKit, mast/stem cell growth factor receptor kit; Mac1, macrophage-1 antigen; TER119, lymphocyte antigen 76.
